# Supplementary material
Source: PubMed Central journal article supplement (PMC3772986)
Supplement: NIHMS485489-supplement-Supp_Fig_S1-S2.pdf [file NIHMS485489-supplement-Supp_Fig_S1-S2.pdf]

# Supplemental Figure 1

**A**

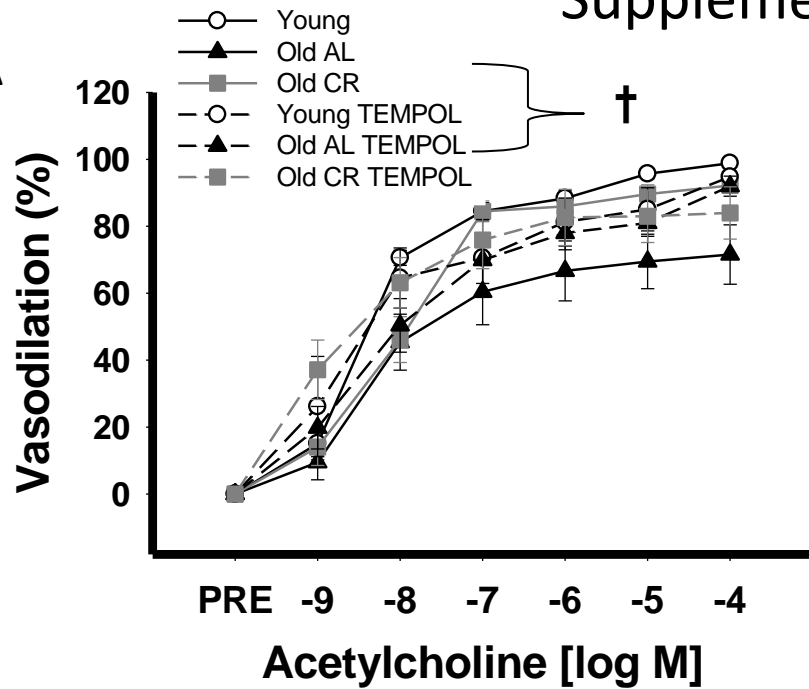

**B**

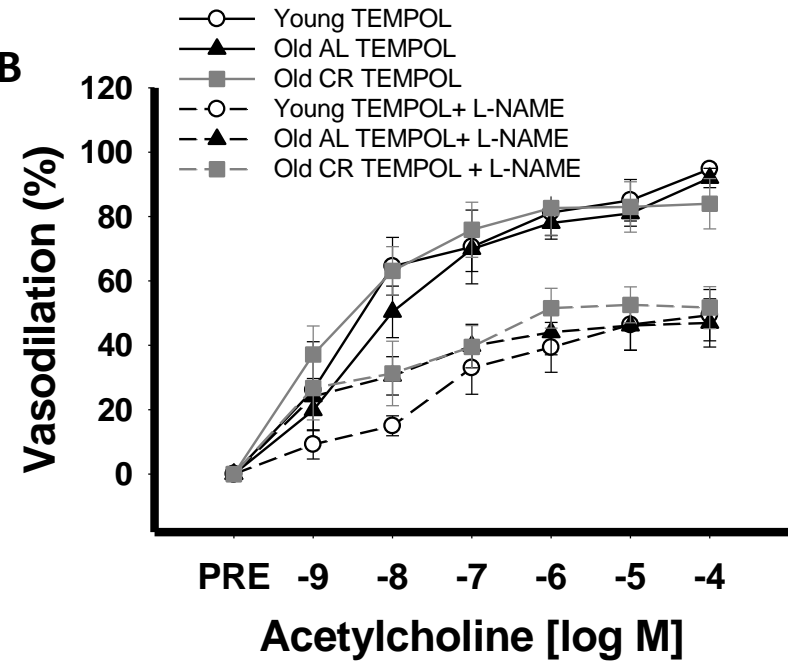

**C**

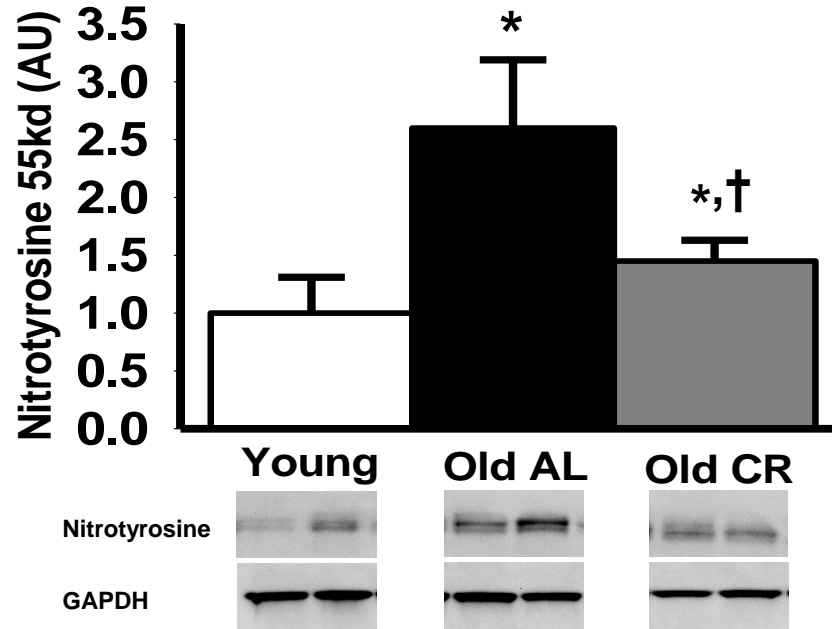

# Supplemental Figure 2

## NIH-31/NIA Fortified Diet & NIH31 Average Nutrient Composition

Page 2

### Ingredients:

Ground wheat, ground corn, ground oats, wheat middlings, fish meal, soybean meal, corn gluten meal, dehydrated alfalfa meal, soybean oil, dicalcium phosphate, brewers dried yeast, salt, calcium carbonate, choline chloride, menadione sodium bisulfite complex (source of vitamin K activity), thiamine mononitrate, calcium pantothenate, vitamin E supplement, vitamin A acetate, riboflavin, vitamin B12 supplement, niacin, vitamin D3 supplement, pyridoxine HCL, folic acid, biotin, magnesium oxide, ferrous sulfate, manganous oxide, copper sulfate, zinc oxide, calcium iodate, cobalt carbonate.

### Average Nutrient Composition

|                       |        | <u>NIH-31/NIA Fortified</u> | <u>NIH-31</u> |
|-----------------------|--------|-----------------------------|---------------|
| Protein               | %      | 18.74                       | 18.42         |
| Fat                   | %      | 4.41                        | 4.47          |
| Fiber                 | %      | 4.58                        | 4.05          |
| Ash                   | %      | 6.51                        | 6.64          |
| Nitrogen-Free Extract | %      | 55.04                       | 55.91         |
| Gross Energy          | kcal/g | 3.95                        | 4.02          |
| Digestible Energy     | kcal/g | 3.36                        | --            |
| Metabolizable Energy  | kcal/g | 3.07                        | --            |
| Linoleic Acid         | %      | 1.79                        | --            |
| Moisture              | %      | --                          | 10.51         |

### Amino Acids

|               |   | <u>NIH-31/NIA Fortified</u> | <u>NIH-31</u>      |
|---------------|---|-----------------------------|--------------------|
| Arginine      | % | 1.10                        | 1.06               |
| Methionine    | % | 0.36                        | 0.39               |
| Histidine     | % | 0.42                        | 0.41               |
| Leucine       | % | 1.50                        | 1.61               |
| Lysine        | % | 0.96                        | 0.95               |
| Tryptophan    | % | 0.22                        | 0.24               |
| Valine        | % | 0.88                        | 0.96               |
| Cystine       | % | 0.26                        | 0.28               |
| Isoleucine    | % | 0.76                        | 0.90               |
| Threonine     | % | 0.71                        | 0.71               |
| Pherylalanine | % | 1.53                        | Pherylalanine 0.92 |
| +Tyrosine     |   |                             | Tyrosine 0.70      |

### Minerals

|            |       | <u>NIH-31/NIA Fortified</u> | <u>NIH-31</u> |
|------------|-------|-----------------------------|---------------|
| Calcium    | %     | 1.03                        | 1.06          |
| Phosphorus | %     | 0.93                        | 0.92          |
| Sodium     | %     | 0.30                        | 0.26          |
| Chlorine   | %     | 0.48                        | 0.42          |
| Potassium  | %     | 0.59                        | 0.59          |
| Magnesium  | %     | 0.20                        | 0.20          |
| Iron       | mg/Kg | 336.41                      | 300.20        |
| Maganese   | mg/Kg | 156.01                      | 152.80        |
| Zinc       | mg/Kg | 48.41                       | 50.40         |
| Copper     | mg/Kg | 13.28                       | 13.20         |
| Iodine     | mg/Kg | 2.01                        | 1.94          |
| Cobalt     | mg/Kg | 0.53                        | 0.53          |
| Selenium   | mg/Kg | 0.30                        | --            |

### Vitamins

|                  |        | <u>NIH-31/NIA Fortified</u> | <u>NIH-31</u> |
|------------------|--------|-----------------------------|---------------|
| Vitamin A        | IU/g   | 40.49                       | --            |
| Vitamin A3       | IU/g   | --                          | 30.73         |
| Vitamin D3       | IU/g   | 7.00                        | 4.19          |
| Vitamin E        | mg/Kg  | 52.15                       | 38.30         |
| Choline          | mg/g   | 2.60                        | 1.96          |
| Niacin           | mg/Kg  | 116.16                      | 92.20         |
| Pantothenic Acid | mg/Kg  | 55.07                       | 39.50         |
| Pyridoxine       | mg/Kg  | 13.16                       | 10.20         |
| Riboflavin       | mg/Kg  | 11.04                       | 7.80          |
| Thiamine         | mg/Kg  | 123.44                      | 77.30         |
| Menadione        | mg/Kg  | 111.01                      | 22.00         |
| Folic Acid       | mg/Kg  | 2.13                        | 1.70          |
| Biotin           | mg/Kg  | 0.38                        | 0.13          |
| Vitamin B12      | mcg/Kg | 93.80                       | 53.00         |
| Vitamin C        | mg/g   | --                          | --            |
| Carotene         | mg/Kg  | --                          | --            |
